# Supplementary material for: Determination of potential main sites of apixaban binding in human serum albumin by combined spectroscopic and docking investigations
Source: Royal Society of Chemistry journal article supplement (doi:10.1039/c5ra15430h), 2015-01-01
Supplement: c5ra15430h1.pdf [file c5ra15430h1.pdf]

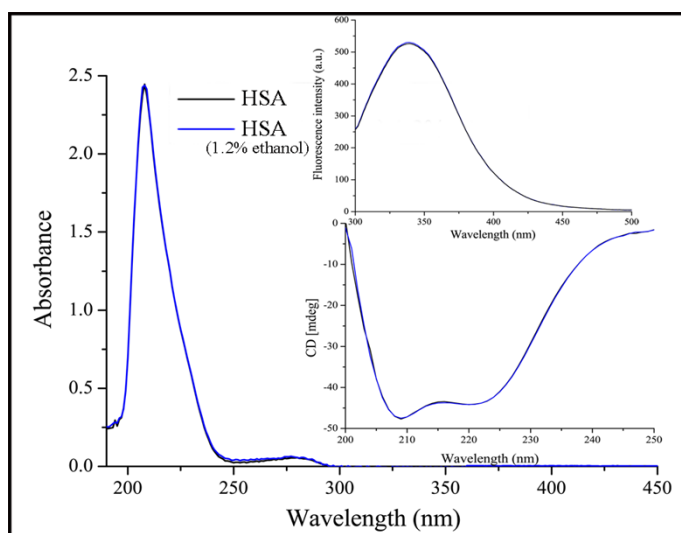

**Fig. S1.** Absorption, fluorescence, CD spectra of HSA (black) and HSA contains 1.2% ethanol (blue).

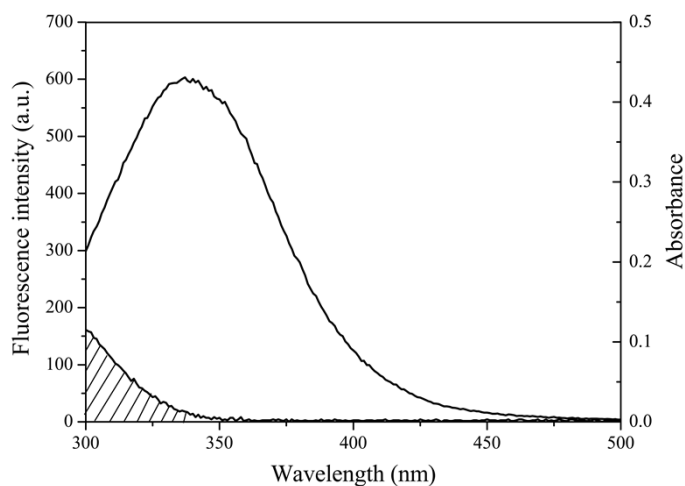

**Fig. S2.** Spectral overlaps of the absorption spectra of AP with the fluorescence spectra of HSA.  $C_{(AP)} = C_{(HSA)} = 10.0 \mu\text{M}$ .

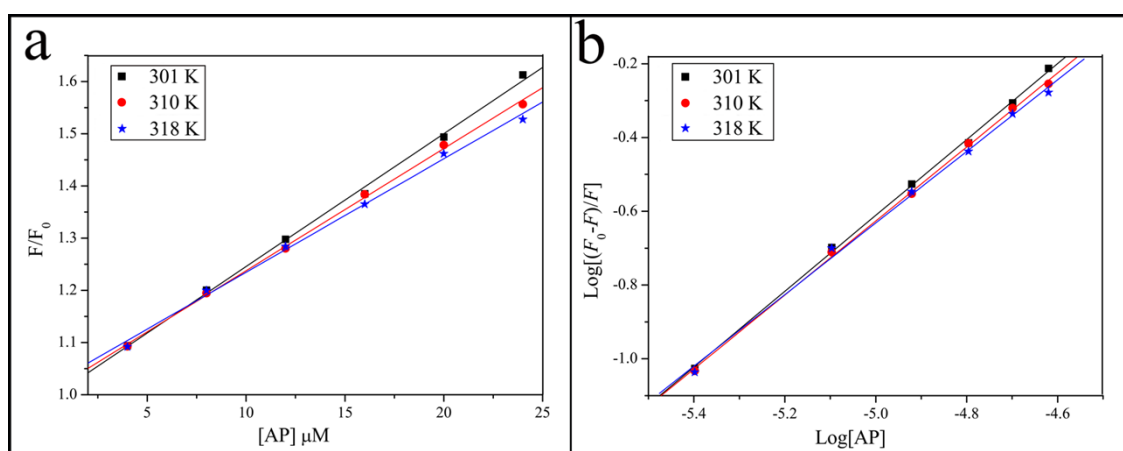

**Fig. S3.** Stern–Volmer plots (a) and modified Stern–Volmer plots (b) of AP–HSA system.

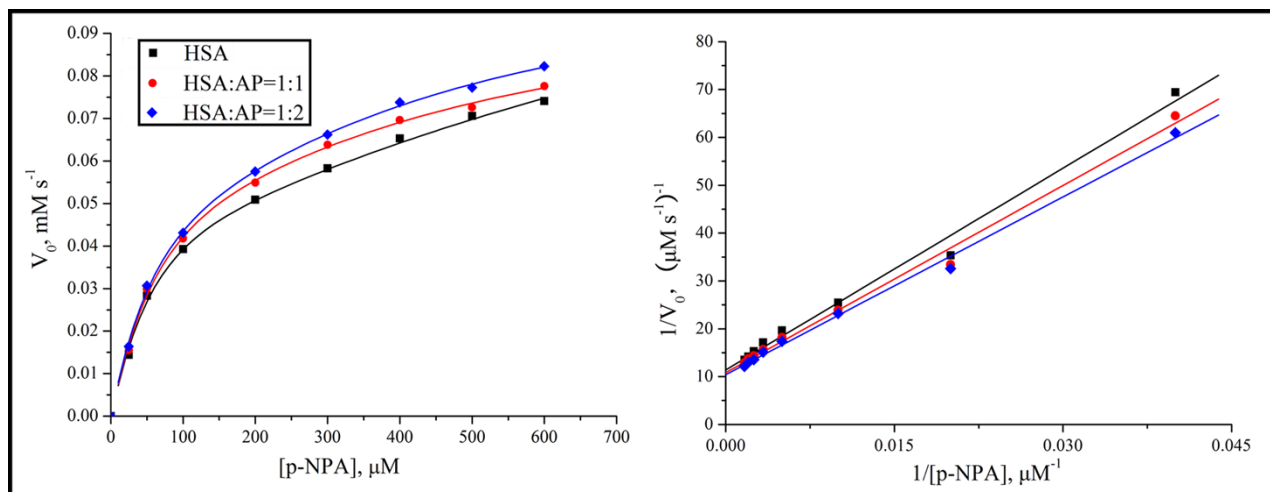

**Fig. S4.** Steady-state kinetics of p-NPA hydrolysis by HSA in the absence and presence of varying concentrations of AP.
